# Supplementary material for: The Impact of Insect Flour on Sourdough Fermentation-Fatty Acids, Amino-Acids, Minerals and Volatile Profile
Source: MDPI journal article supplement (doi:10.3390/insects13070576), 2022-06-24
Supplement: s1 [file s1]

Table S1. Working conditions for Varian Spectra 240 FS spectrophotometer

| Metal | $\lambda$ (nm) | Lamp current (mA) | Slit width |
|-------|----------------|-------------------|------------|
| Ni    | 232            | 4                 | 0.2        |
| Cr    | 357.9          | 7                 | 0.2        |
| Cu    | 324.8          | 4                 | 0.5        |
| Cd    | 228.8          | 4                 | 0.5        |
| Mn    | 279.5          | 5                 | 0.2        |
| Zn    | 213            | 5                 | 1          |
| Fe    | 248.3          | 5                 | 0.2        |
